# Supplementary material for: Photon- and Singlet-Oxygen-Induced Cis–Trans Isomerization of the Water-Soluble Carotenoid Crocin
Source: MDPI journal article supplement (doi:10.3390/ijms241310783), 2023-06-28
Supplement: s1 [file s1]

## Supplementary Materials

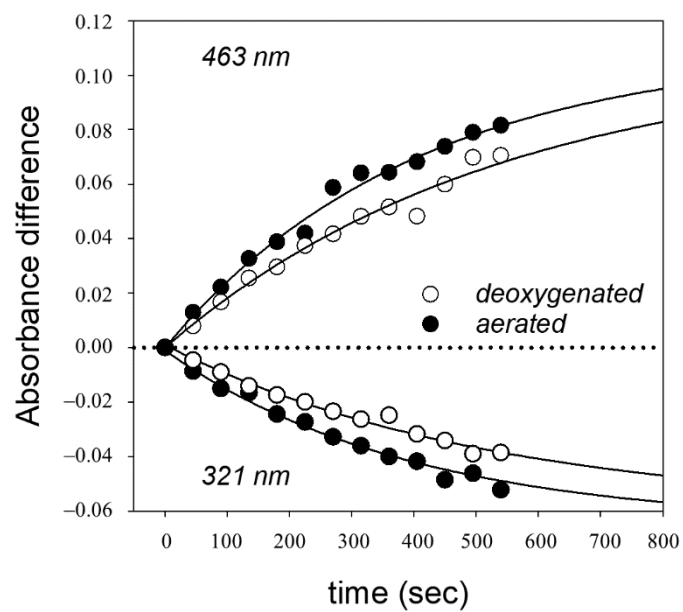

**Figure S1.** Time evolution of the difference absorbance values at 321 and 463 nm during irradiation at 488 nm, starting from a solution of 13-cis-CR in methanol at the concentration of 3.6  $\mu\text{M}$ . Full line represented the data fitting exponential curves.

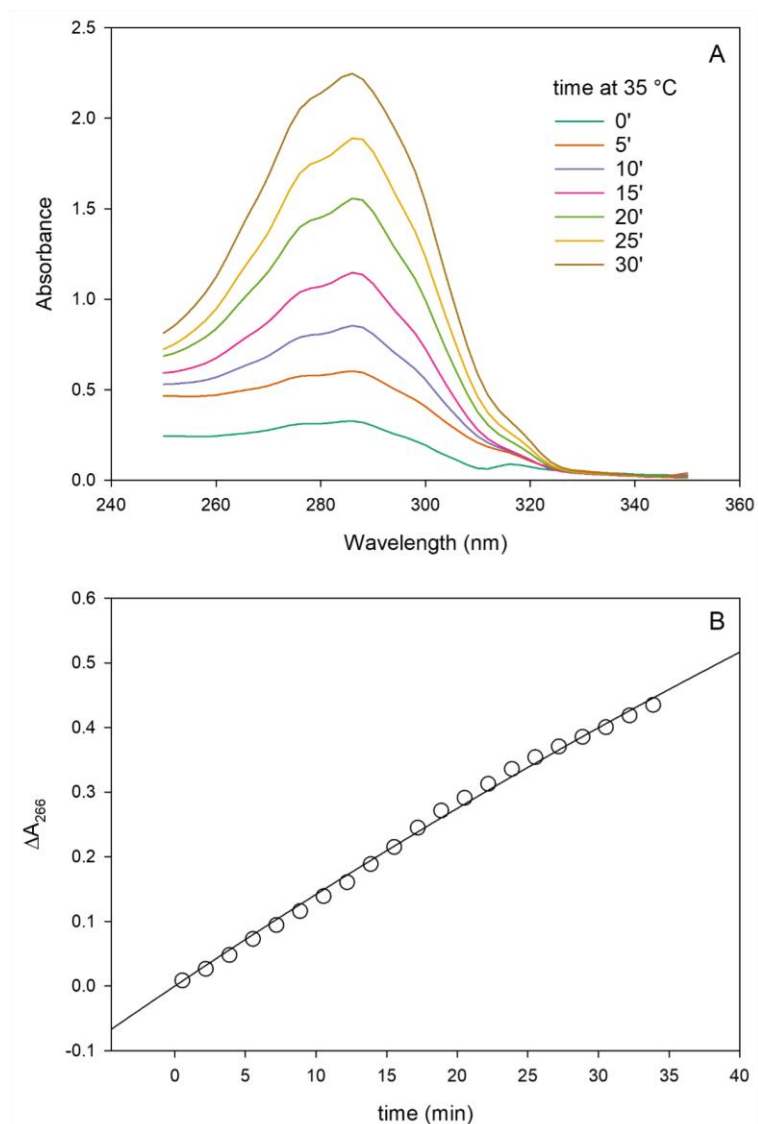

**Figure S2.** (A) Absorption spectra of the naphthalenic acid thermally produced by the decomposition of the 3-(1,4-epidioxy-4-methyl-1,4-dihydro-1-naphthyl)propionic acid at 35 °C. (B) Time evolution of the difference absorbance at 266 nm of the naphthalenic acid at 35 °C. The solid line represents the exponential function fitting of data.
